# Supplementary material
Source: publisher figshare collection journal article supplement (https://springernature.figshare.com/ndownloader/files/22786451)
Supplement: Supplementary file 1 [file 22786451]

| **Supplementary table 1- Multivariable multinomial logistic regression of the association between year of inclusion and contraceptive use corrected for demographic factors*.** | | | | | | | | |
| --- | --- | --- | --- | --- | --- | --- | --- | --- |
|  | | **Contraceptive use** | | | | | |  |
| **No contraceptive use** | | **Short-acting reversible contraceptive use** | | **Long-acting reversible contraceptive use** | |  |
| OR | 95%CI | OR | 95%CI | OR | 95%CI | P-value |
| Year of inclusion | |  |  |  |  |  |  | <0.001 |
|  | 2005 | ref |  | ref |  | ref |  |  |
|  | 2012 | ref |  | 1.60 | 1.19-2.16 | 3.14 | 1.96-5.00 |  |
|  | 2017 | ref |  | 0.79 | 0.62-1.00 | 4.35 | 2.91-6.49 |  |

* Corrected for age, religion, educational level, ethnicity and partner status.
